# Supplementary material
Source: publisher site journal article supplement (https://www.dovepress.com/article/336870)
Supplement: Supplementary file 1 [file get_supplementary_file.php]

**Supplementary file 1.** Definitions of postoperative complications

| **Event** | **Definition** |
| --- | --- |
| Atrial fibrillation | A new onset of atrial fibrillation/flutter (AF) requiring treatment. Does not include recurrence of previously documented AF which had been present preoperatively. |
| Cardiac arrest | An acute cardiac arrest documented by one of the following: 1. ventricular fibrillation; 2. rapid ventricular tachycardia with hemodynamic instability; 3. asystole. |
| Heart block | A new heart block requiring the implantation of the permanent pacemaker of any type prior to discharge. |
| Myocardial infarction | < 24 h: CK-MB greater than or equal to 5 times the upper limit of normal, with or without new Q waves present in two or more contiguous ECG leads. No symptoms required.  > 24 h documented by at least one of the following criteria: 1. evolutionary ST-segment elevations; 2. development of new Q-waves in two or more contiguous ECG leads; 3. new or presumably new LBBB pattern on the ECG; 4. CK-MB greater than or equal to 3 times the upper limit of normal. |
| Atelectasis | Lung opacification with a shift of the mediastinum, hilum or hemidiaphragm toward the affected area, and compensatory over-inflation in the adjacent non-atelectatic lung. |
| Acute respiratory distress syndrome | Within one week of a known clinical insult or new or worsening respiratory symptoms. Bilateral opacities not fully explained by effusions, lobar/lung collapse, or nodules. Respiratory failure not fully explained by cardiac failure or fluid overload. Need objective assessment (e.g. echocardiography) to exclude hydrostatic oedema if no risk factor present.   - Mild. PaO2: FIO2 between 26.7 and 40.0 kPa (200–300 mmHg) with PEEP or CPAP ≥5 cmH2O. - Moderate. PaO2: FIO2 between 13.3 and 26.6 kPa (100–200 mmHg) with PEEP ≥5 cmH2O. - Severe. PaO2: FIO2 ≤13.3 kPa (100 mmHg) with PEEP ≥ 5 cmH2O. |
| Pneumonia | Two or more serial chest radiographs with at least one of the following (one radiograph is sufficient for patients with no underlying pulmonary or cardiac disease): 1. new or progressive and persistent infiltrates; 2. consolidation; 3. cavitation.  At least one of the following: 1. fever (> 38oC) with no other recognised cause; 2. leucopoenia (white cell count < 4∙109∙L-1) or leucocytosis (white cell count > 12∙109∙L-1); 3. for adults >70 years old, altered mental status with no other recognised cause.  And at least two of the following: 1. new onset of purulent sputum or change in character of sputum, or increased respiratory secretions, or increased suctioning requirements; 2. new onset or worsening cough, or dyspnoea, or tachypnoea; 3. bronchial breath sounds.  Worsening gas exchange (hypoxaemia, increased oxygen requirement, increased ventilator demand) |
| Respiratory failure | Postoperative PaO2 < 8 kPa (60 mmHg) on room air, a PaO2:FI02 ratio <40 kPa (300 mmHg) or arterial oxyhaemoglobin saturation measured with pulse oximetry < 90% and requiring oxygen therapy. |
| Delirium | Delirium assessed using the confusion assessment method for the ICU (CAM-ICU) within the first 7 days after surgery or until ICU discharge. |
| Transient ischemic attack | A loss of neurological function that was abrupt in onset but with complete return of function with 24 hours. |
| Stroke | New focal neurological deficit that appears and is still at least partially evident 24 hours after its onset, occurring during or after surgery and established before discharge. Patients suspected of having a stroke was evaluated by a neurologist and brain imaging obtained. |
| Acute kidney injury | Stage 1: serum creatinine increase ≥ 26.5 μmol/L (≥ 0.3 mg/dL) or increase to 1.5-fold to twofold from baseline or urinary output < 0.5 mL/kg/hour for 6 hours.  Stage 2: serum creatinine increases more than twofold to threefold from baseline or urinary output < 0.5 mL/kg/hour for 12 hours.  Stage 3: serum creatinine increases more than threefold from baseline or serum creatinine ≥ 354 μmol/L (≥ 4.0 mg/dL) or urinary output < 0.3 mL/ kg/hour for 24 hours or anuria for 12 hours or a need for renal replacement therapy. |
| Renal failure | Acute renal failure or worsening renal function resulting in one or both of the following: 1. increase of serum creatinine to > 2.0 and 2x most recent preoperative creatinine level; 2. a new requirement for dialysis postoperatively. |
| Renal replacement therapy | A new requirement for dialysis postoperatively, which may include hemodialysis, peritoneal dialysis. |
| Deep vein thrombosis | A new blood clot or thrombus within the venous system. |
| Wound infection | The infection appears to be related to the surgical procedure and involves any part of the body, excluding the skin incision, fascia or muscle layers opened or manipulated during the operative procedure.  The patient has at least one of the following: 1. purulent drainage from a drain that is placed through a stab wound into the organ/space; 2. organisms isolated from an aseptically obtained culture of fluid or tissue in the organ/space; 3. an abscess or other evidence of infection involving the organ/space that is found on direct examination, during reoperation or by histopathological or radiological examination; 4. diagnosis of an organ/space surgical site infection by a surgeon or attending physician. |
| Sepsis | A systemic inflammatory response syndrome when at least two of the following criteria are present: hypo-or hyperthermia (>38.5 or < 36.0 °C), tachycardia or bradycardia, tachypnea, leukocytosis or leukopenia, and thrombocytopenia. |
| Reoperation for hemorrhage | The patient was reexplored for mediastinal bleeding with or without tamponade either in the ICU or returned to the operating room. |
| Anastomotic leak | Leak of luminal contents from a surgical connection between two hollow viscera. The luminal contents may emerge either through the wound or at the drain site, or they may collect near the anastomosis, causing fever, abscess, septicaemia, metabolic disturbance and/or multiple organ failure. The escape of luminal contents from the site of the anastomosis into an adjacent localised area, detected by imaging, in the absence of clinical symptoms and signs should be recorded as a subclinical leak. |
| Paralytic ileus | Failure to tolerate solid food or defecate for three or more days after surgery. |
